# Supplementary material
Source: PubMed Central journal article supplement (PMC1599995)

**Laser Doppler-derived relative blood flow  
(% control = mice without cell injection)**

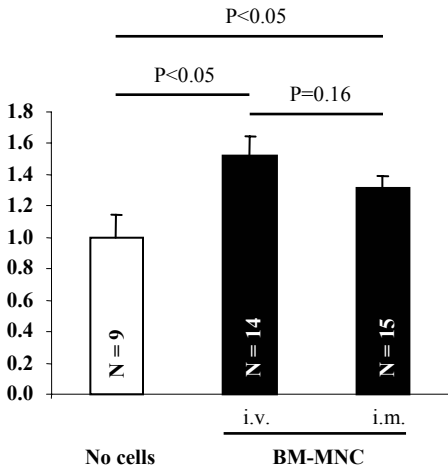

Supplement: pnas_0604144103_1.pdf [file pnas_0604144103_1.pdf]
